# Supplementary material
Source: PubMed Central journal article supplement (PMC5072443)

**a**

serum hsa-let-7b levels

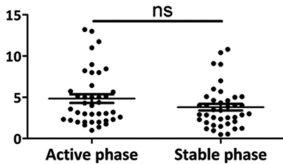**b**

serum miR-16 levels

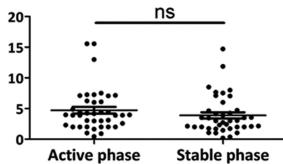**c**

serum miR-451 levels

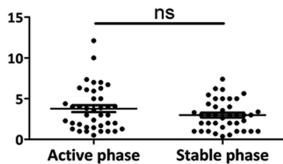**d**

serum miR-15b levels

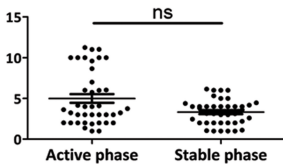

High magnification

gp100

Merge

gp100

Merge

miR-25

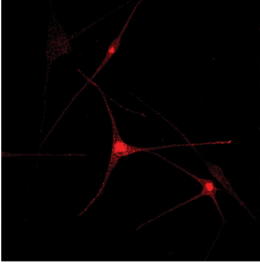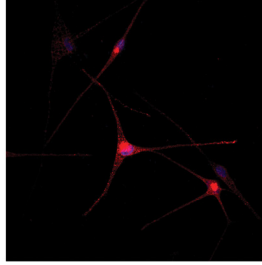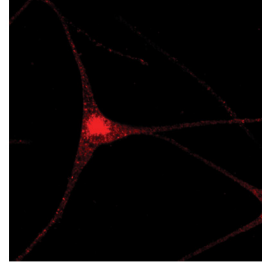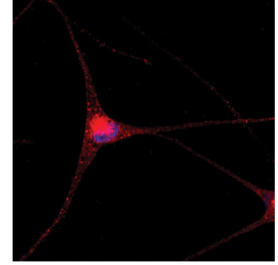

anti-miR-25

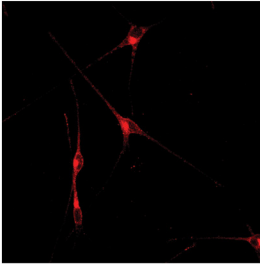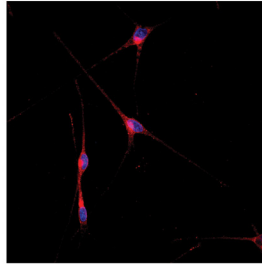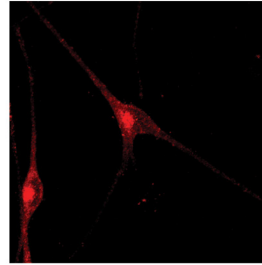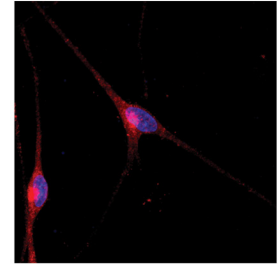

miR-nc

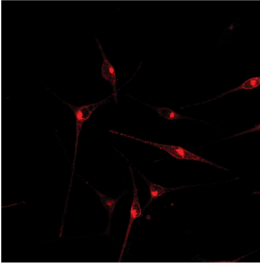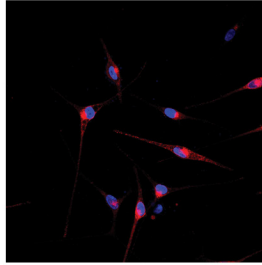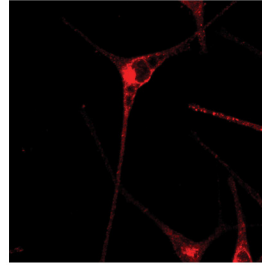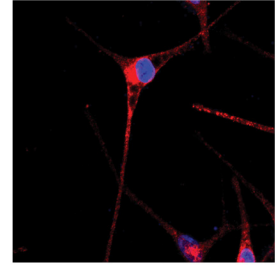

miR-25+  
MITF plasmid

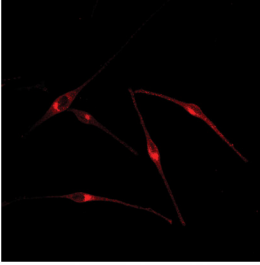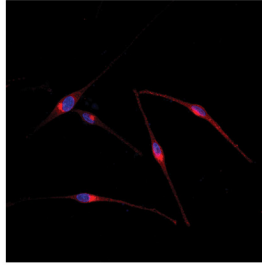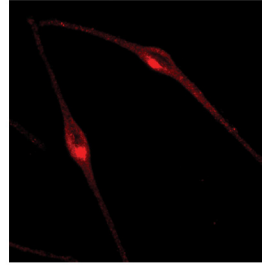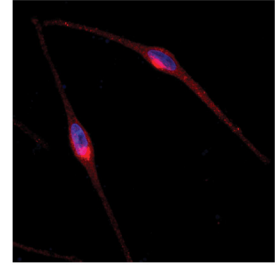

miR-25+  
nc plasmid

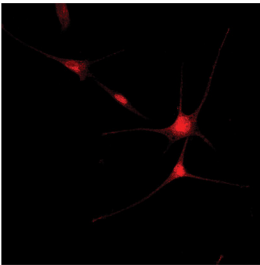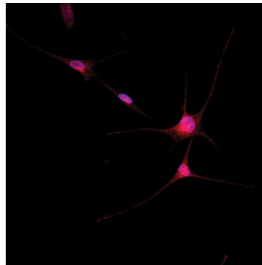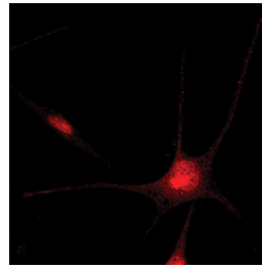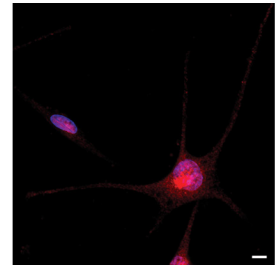

miRanda

PICTAR5

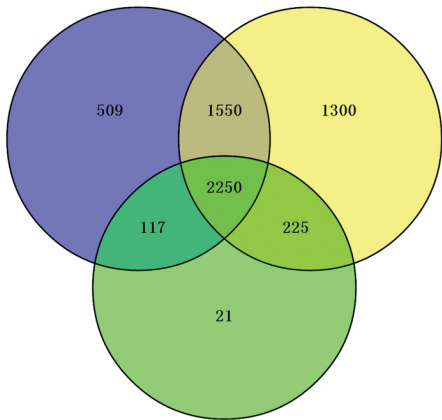

Targetscan

**a**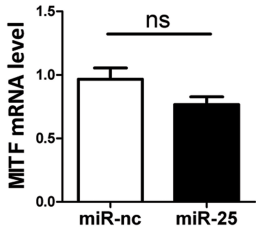**b**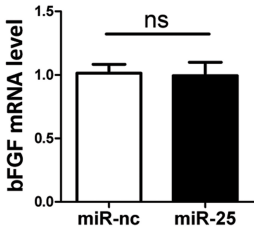**c**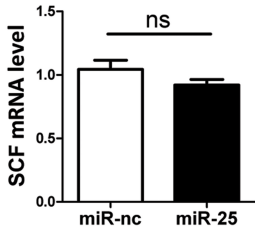



**NC plasmid**

**MITF plasmid**

**MITF**

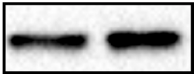

**52kD**

**$\beta$ -actin**

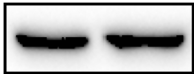

**43kD**

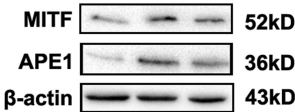

|                                   |   |   |   |
|-----------------------------------|---|---|---|
| <b>H<sub>2</sub>O<sub>2</sub></b> | - | - | - |
| <b>miR-25</b>                     | + | - | - |
| <b>anti-miR-25</b>                | - | + | - |
| <b>miR-nc</b>                     | - | - | + |

*nc plasmid*

*APE1 plasmid*

**APE1**

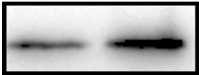

**36kD**

**$\beta$ -actin**

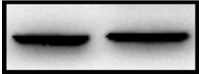

**43kD**

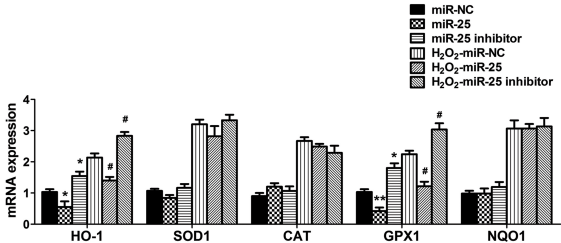

a

### Promoter miR-25-1 sequence (-381 bp to +30 bp)

ccccttgaggacagaatgaagaattgggaaatcatggccgttctggagagtagacaagaagaccggcgaaagtcggg  
 cctgcccccgccctgcggccccggaacaaaagaaccgggtgtgcgtggccctttaagagcgattctcctcgcccccgcca  
 gctcggacccggggaaaccgggcgcctgcactacccgcccggagattcccttcgaccgcccccgcacccgcctcccccgtcac  
 tcattctaggcccgcaccggtgattggcttcggctagcgggaggtgaagaagcccgccttgcgattggcccgcaccg  
 agtgcgcccggtaccgtgggggggcgaccgtttcggccaattcggttggcccggccacagtcacccggcggagattctc  
 agcttcccaggagc

b

### Promoter miR-25-2 sequence (+23 bp to +481 bp)

ccaggagcaagacctctgagccccgccaagcggcgcaccggccctcggaccgatggcactgaaggactaccggcgcta  
 gagaagggtaccggggtctaccgagccccgggagggcgtcttcggcggggagcctcccggggaacacctgttggtgtgagct  
 ggggtctgggggaccgggggtcggcgggttctgggggtgcggagccagaggcagggtcgagctgcggcctggctaa  
 ggcccccggggctgggaagcgtgcgggggccatcgatgttgaagaaaagctagtaatcccacctggtaaagggtgta  
 ggggtcgtgggggtgggggctgggggcggctaacccggctgggggctgcacagggaaaagtcggcgcccaggacctc  
 aggagagtctaagggtctgggctccccgtgcccgctttccttcggcttttgggattcccagggttccc

c

### Promoter miR-25-3 sequence (+409 bp to +774 bp)

ctcaggagagtcttaagggtctgggctccccgtgcccgtttcttcggcttttgggattcccagggttccccggcgccctcc  
 ccaggcggcggtaggcccccggggggcgggcagggcccggggcgctgcggcgccgggattggcgtttgaggcgccc  
 tcccgagcggaagtggagccggggcggaagtggcggagggaggtggagggagtgcgtgtaaacagtgtccttcg  
cggcggcggagagagctgcggccccggggggcgtgctgggatcccggagcttcggcgggccccgggaaa  
 ggcggcaagtgggctgggatcgggtgtctctgggtgtgatggccaatggctggactggctc

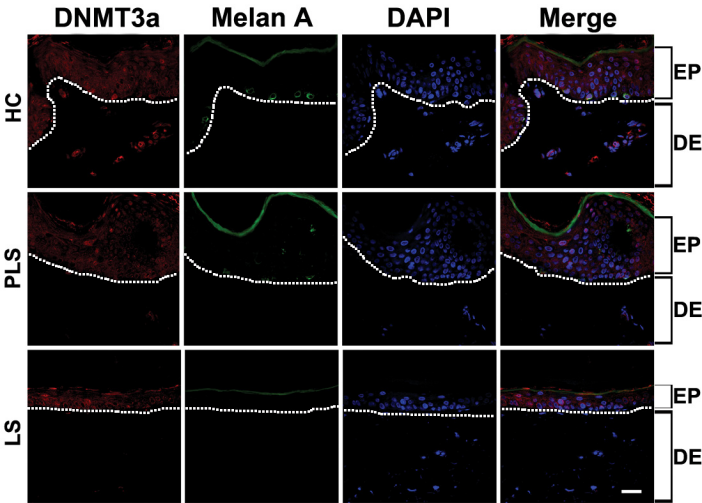

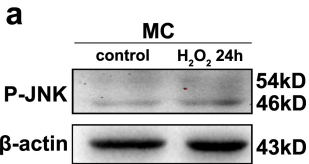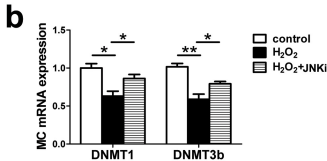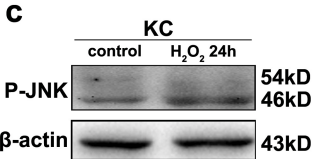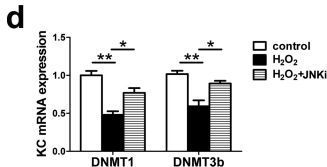

Supplement: cdd2015117x5.pdf [file cdd2015117x5.pdf]
